# Supplementary material for: Testing the moderating role of in-person and virtual social interactions among university students on the relationship between loneliness and anxiety or depressive symptoms
Source: Research Square preprint supplement (doi:10.21203/rs.3.rs-6914480/v1), 2025-07-17
Supplement: Supplementary file 1 [file 5c61ada8ff243466d58fc69c.docx]

**Testing the moderating role of in-person and virtual social interactions among university students on the relationship between loneliness and anxiety or depressive symptoms**

Ilaria Riboldi1*, Cristina Crocamo1, Chiara Alessandra Capogrosso1, Francesco Bartoli1, Jo Armes2, Cath Taylor2, Giuseppe Carrà1

1 School of Medicine and Surgery, University of Milano-Bicocca, Via Cadore 48, 20900 Monza, Italy

2 Faculty of Health and Medical Sciences, School of Health and Sciences, University of Surrey, Stag Hill, Guildford GU2 7XH, UK

*Corresponding author: Ilaria Riboldi, MD, PhD

School of Medicine and Surgery, University of Milano-Bicocca. Via Cadore 48, 20900 - Monza, Italy. Tel. +39 0264488326.

Email address: [ilaria.riboldi@unimib.it](mailto:ilaria.riboldi@unimib.it)

**Supplementary Table 1**. Sample characteristics by country.

| **Characteristics** | **Italy**  N=1,352  *N (%) or Mean (SD)* | **UK** |
| --- | --- | --- |
| N=703 |
| *N (%) or Mean (SD)* |
| ***Gender***  Women  Men | 1039 (76.8%)  281 (20.8%) | 511 (72.7%)  161 (22.9%) |
| ***Age****, yrs.* | 23.34 (4.98) | 21.70 (5.46) |
| ***Years of study*** |  |  |
| First | 402 (29.7%) | 262 (37.3%) |
| Second | 419 (31.0%) | 215 (30.6%) |
| Third | 298 (22.0%) | 147 (20.9%) |
| Fourth | 63 (4.7%) | 55 (7.8%) |
| Fifth - Sixth | 115 (8.5%) | 11 (1.6%) |
| ***Degree Programme Area*** |  |  |
| Applied/Naturale Sciences1 | 345 (25.5%) | 111(15.8%) |
| Economic/Legal Sciences2 | 239 (17.7%) | 104 (14.8%) |
| Medical Sciences3 | 139 (10.3%) | 378 (53.8%) |
| Psychosocial Sciences4 | 628 (46.4%) | 75 (10.7%) |
| ***International student*** | 19 (1.4%) | 84 (12.0%) |
| ***Out-of-town student*** | 413 (30.6%) | 273 (38.8%) |
| ***Employment***  Non-worker  Part-time or full-time worker | 665 (49.2%)  658 (48.7%) | 18 (2.6%)  674 (95.9%) |
| ***Accommodation*** |  |  |
| With family of origin | 974 (72.0%) | 97 (13.8%) |
| With roommates | 167 (12.4%) | 208 (29.6%) |
| With partner | 28 (2.1%) | 274 (39.0%) |
| Alone | 62 (4.6%) | 41 (5.8%) |
| ***On track with exams*** | 771 (57.0%) | 527 (75.0%) |
| ***Social interactions – family*** |  |  |
| Daily/more time a week | 1045 (77.3%) | 365 (51.9%) |
| Weekly | 117 (8.7%) | 134 (19.1%) |
| Monthly or less | 168 (12.4%) | 181 (25.8%) |
| ***Social interactions – partner*** |  |  |
| Daily/more time a week | 550 (40.7%) | 67 (9.4%) |
| Weekly | 97 (7.2%) | 55 (7.8%) |
| Monthly or less | 68 (5.0%) | 219 (31.2%) |
| ***Social interactions – friends*** |  |  |
| Daily/more time a week | 518 (38.3%) | 128 (18.2%) |
| Weekly | 585 (43.3%) | 104 (14.8%) |
| Monthly or less | 227 (16.8%) | 466 (66.3%) |
| ***Social interactions – classmates*** |  |  |
| Daily/more time a week | 768 (56.8%) | 133 (18.9%) |
| Weekly | 149 (11.0%) | 84 (12.0%) |
| Monthly or less | 338 (25.0%) | 463 (65.9%) |
| ***Time spent on social media*** |  |  |
| <1 hrs. | 201 (14.9%) | 61 (8.7%) |
| From 1 to 3 hrs. | 756 (55.9%) | 282 (40.1%) |
| From 3 to 5 hrs. | 298 (22.0%) | 264 (36.1%) |
| >5 hrs. | 83 (6.1%) | 97 (13.8%) |
| ***Number of social media platforms*** |  |  |
| 1 | 635 (47.0%) | 362 (51.5%) |
| 2 | 585 (43.3%) | 213 (30.3%) |
| 3 | 123 (9.1%) | 104 (14.8%) |
| ≥ 4 | 9 (0.7%) | 24 (3.4%) |
| ***Anxiety symptoms (GAD-7)*** | 9.59 (4.96) | 8.86 (5.91) |
| ***Depressive symptoms (PHQ-9)*** | 9.34 (5.95) | 10.81 (6.56) |
| ***Insomnia symptoms (ISI)*** | 8.43 (4.68) | 10.29 (5.10) |
| ***Loneliness (UCLA)*** | 49.02 (12.20) | 48.30 (12.52) |

SD: Standard deviation.

Missing values are not reported in the table.

1Applied/Natural Sciences: Biochemistry; Biology; Biomedical Engineering; Biomedical Sciences; Computer Sciences; Geology; Maths.

2Economic/Legal Sciences: Economics; Hospitality and Tourism; Law; Politics.

3Medical sciences: Medicine and Surgery; Nursing; Nutrition; Paramedics; Veterinary Medicine.

4Psychosocial sciences: Education Sciences; Intercultural communication; Psychology; Sociology.
